# Supplementary material
Source: publisher figshare collection journal article supplement (https://frontiersin.figshare.com/ndownloader/files/35513795)
Supplement: Supplementary file [file 35513795]

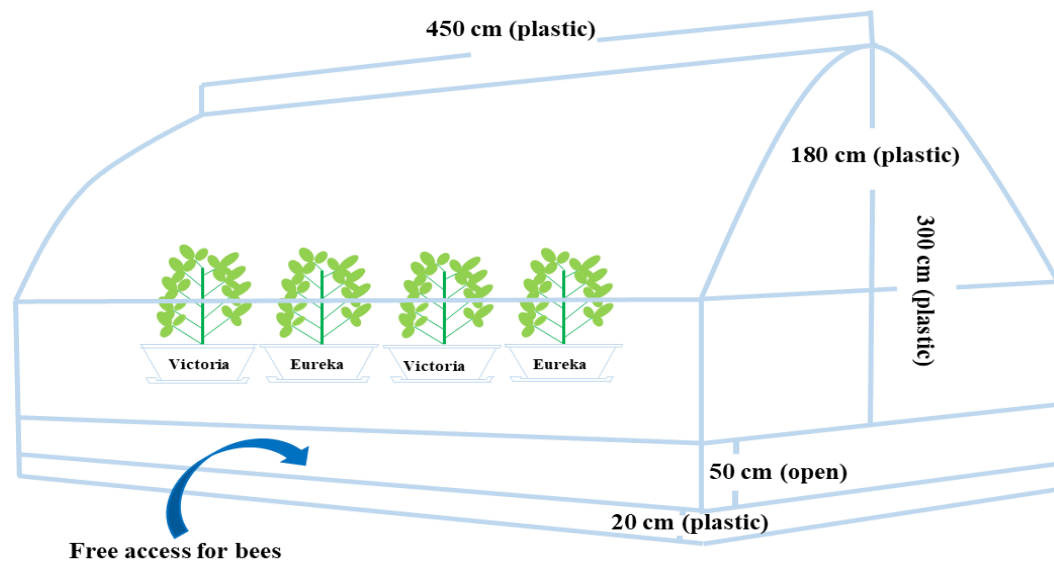

**FIGURE S1** | Diagram of the plastic greenhouse.
